# Supplementary material for: Economics of Great Green Wall: Opportunities for improved targeting and efficiency
Source: Research Square preprint supplement (doi:10.21203/rs.3.rs-337077/v1), 2021-03-22
Supplement: Supplementary file 1 [file 60f5d46ef017cdc394f6db75.docx]

# **Supplementary Materials**

## ***Supplementary Material 1.***

## ***Assessment of LULC changes***

The Sahel region experienced considerable land use and land cover changes during the last two decades. The Modis500 LULC data for the period between 2001 and 2018 points at very informative LULC trends (Table S1.1.). During this period, according to Modis500 LULC data, grasslands in the Sahel expanded by 13 million ha, whereas, the barren areas declined by 8.6 million ha. Another major difference between 2001 and 2018 across the region is an apparent reduction of cropped areas, in total by 0.75 million hectares for the entire region. An important definitional point to clarify here is that cropland category under the Modis500 LULC dataset includes under croplands actually cropped areas, and does not include fallowed lands. Fallowed lands in Modis500 LULC dataset are included under other land uses, e.g. primarily grasslands. On the other hand, fallowed lands are included under croplands within the national or international statistics. Moreover, despite high resolution of pixel size (25 hectares), this Modis500 LULC database underrepresents croplands due to small farm sizes across the Sahel and frequent interspersion of cropped areas within other biomes. Combination of croplands and cropland/natural vegetation mosaics as a single “croplands” category in our analysis, however, is meant to remedy this aspect, at least to some extent.

In general, for all the countries of the Sahel, FAOSTAT shows 120 million hectares of croplands (according to FAOSTAT definition this includes actually cropped areas, including permanent crops, e.g. orchards, temporary meadows and pastures, and fallows) in 2017, whereas Modis500 LULC data shows 84 million hectares (only areas actually cropped with annual crops). This issue of imprecise identification and mapping of croplands (as they are defined in FAOSTAT and national statistics) is not particular to Modis500 LULC data, but remains a shortcoming of all remotely sensed LULC mapping products. For example, van Vliet et al. (2013) highlight the wide discrepancies in the measurement of actual extent of croplands across the Sahel region. The same uncertainty about the true extent of croplands is emphasized by Samasse et al.(2020) who indicate that none of the existing cropland maps reach 75% accuracy. Their analysis using much more granular Landsat 8 data (pixel size = 0.09 ha) for Mali, Niger, Burkina Faso, Mauritania and Senegal finds the extent of croplands to equal 31,6 million hectares during 2013-2015, while the FAOSTAT data shows 33.2 million hectares, the Modis500 LULC data used shows 13.3 million ha of cropped areas for the same countries. However, Samasse et al. (2020) also indicate that they included fallows within croplands.

In the Sahel, crop-fallow rotation practices are extensively used (Tong et al., 2020). Indeed, Tong et al. (2020), using various cropland datasets, found the share of fallow lands within croplands varies between 57%-62%. FAOSTAT does not contain information about share of fallows within croplands for all the Sahelian countries, but for those countries where these data are available, the share of temporary fallows and temporary pastures within croplands varies from 16% to 24%. Hence, the discrepancy of cropland extent by the Modis500 LULC dataset and official statistics could be, to a large extent, explained by fallow land and temporary pastures. These fallow areas and temporary pastures are likely to be included within grassland category in this Modis500 LULC dataset, because Tong et al. (2020) identify that fallow areas in the Sahel region are represented by continuous herbaceous vegetation cover. This lack of distinguishing of fallows from grasslands makes it difficult to properly identify potential cropland areas and their extent, however, for the economic analysis of ecosystem services provided by different biomes, this is not disruptive. Fallow lands are *de facto* used as grasslands, hence, they need to be valued economically as grasslands. It would be highly inaccurate to give them the values of croplands when these fallow lands do not produce any crops, but are mainly used for livestock grazing. Similarly, orchards are by definition included under croplands in official statistics, whereas Modis500 LULC is likely to include them under woodlands/shrublands/forests. These orchards also *de facto* provide a range of ecosystem services similar to woodlands/shrublands/forests and valuing them as “only” croplands would underestimate the values of their ecosystem services. Hence, for the purposes of economic valuation of ecosystem services by different LULC, Modis500 LULC dataset provides not only spatially explicit representation of various LULCs but also such a representation which is amenable for more accurate valuation of ecosystem services by various LULC.

**Table S1.1. LULC transition matrix for the Sahel region, 2001-2018**

| **Land use and land cover in 2001, in thousand ha** | **Land use and land cover in 2018, in thousand ha** | | | | | | | | | **Total** |
| --- | --- | --- | --- | --- | --- | --- | --- | --- | --- | --- |
| **Forest** | **Shrubland** | **Woodland** | **Grassland** | **Wetland** | **Cropland** | **Settlement** | **Barren lands** | **Water bodies** |
| **Forest** | 4,607 | 1 | 778 | 1,394 | 87 | 98 | 4 | 0 | 0 | **6,969** |
| **Shrubland** | 6 | 17,783 | 3 | 7,631 | 3 | 11 | 3 | 380 | 0 | **25,819** |
| **Woodland** | 173 | 0 | 1,725 | 434 | 5 | 190 | 5 | 0 | 0 | **2,531** |
| **Grassland** | 1,392 | 2,535 | 845 | 365,000 | 228 | 16,710 | 111 | 1,914 | 20 | **388,755** |
| **Wetland** | 33 | 0 | 3 | 186 | 1,636 | 10 | 6 | 4 | 8 | **1,887** |
| **Cropland** | 105 | 2 | 115 | 17,384 | 12 | 67,268 | 149 | 7 | 0 | **85,041** |
| **Settlements** | 0 | 0 | 0 | 0 | 0 | 0 | 1,255 | 0 | 0 | **1,255** |
| **Barren lands** | 0 | 1,017 | 0 | 9,853 | 47 | 4 | 5 | 465,000 | 38 | **475,965** |
| **Water bodies** | 0 | 0 | 0 | 4 | 32 | 0 | 0 | 37 | 1,415 | **1,489** |
| **Total** | **6,315** | **21,338** | **3,469** | **401,887** | **2,050** | **84,292** | **1,537** | **467,343** | **1,481** |  |
| **Net gain/loss** | **-654** | **-4,481** | **937** | **13,132** | **163** | **-750** | **282** | **-8,622** | **-8** |  |

Source: Modis500 LULC

**Table S1.2. Land use and land cover transition matrix for Africa, 2001-2018**

| **Land use and land cover in 2001, in thousands ha** | **Land use and land cover in 2018, in thousands ha** | | | | | | | | | **Total loss** |
| --- | --- | --- | --- | --- | --- | --- | --- | --- | --- | --- |
| **Forest** | **Shrubland** | **Woodland** | **Grassland** | **Wetland** | **Cropland** | **Settlement** | **Barren land** | **Water bodies** |
| **Forest** | 241,940 | 222 | 19,715 | 17,445 | 433 | 231 | 7 | 1 | 1 | **279,995** |
| **Shrubland** | 352 | 159,885 | 559 | 29,092 | 8 | 943 | 17 | 2,773 | 1 | **193,630** |
| **Woodland** | 21,987 | 174 | 78,026 | 19,542 | 98 | 546 | 15 | 2 | 1 | **120,392** |
| **Grassland** | 15,767 | 29,157 | 13,074 | 1,075,000 | 1,183 | 28,225 | 381 | 3,168 | 66 | **1,166,022** |
| **Wetland** | 148 | 2 | 50 | 715 | 7,014 | 39 | 7 | 33 | 113 | **8,121** |
| **Cropland** | 134 | 335 | 320 | 27,633 | 28 | 125,764 | 263 | 10 | 2 | **154,490** |
| **Settlement** | 0 | 0 | 0 | 0 | 0 | 0 | 5,013 | 0 | 0 | **5,013** |
| **Barren land** | 0 | 6,818 | 0 | 12,182 | 119 | 37 | 22 | 1,017,500 | 153 | **1,036,832** |
| **Water bodies** | 0 | 5 | 1 | 103 | 317 | 10 | 0 | 234 | 22,073 | **22,744** |
| **Total gain** | **280,329** | **196,599** | **111,746** | **1,181,712** | **9,201** | **155,795** | **5,726** | **1,023,719** | **22,410** |  |
| **Net gain/loss** | **335** | **2,969** | **-8,646** | **15,691** | **1,079** | **1,304** | **713** | **-13,112** | **-334** |

Source: own analysis based on MODIS Land Cover Type Product (MCD12Q1) global maps of land use and cover at 500-m spatial resolution[[1]](#footnote-1)

Note: Despite high resolution of pixel size (25 hectares), this MODIS LUCC database underrepresents croplands because it does not include fallowed land under cropland category, and also small farm sizes across the Sahel and frequent interspersion of cropped areas within other biomes could lead to the lower extent of cropland areas represented.

## ***Supplementary Material 2.***

The analysis of ecosystem services valuation studies from across the Sahel region points at a large dispersion of these ecosystem values by LULC across the region. Hence, in this assessment, we use the median values for the economic valuation of the costs of land degradation, but also provide the outcomes when minimum and maximum values are used, in order to provide a more robust range of possible estimates. A summary of the median, minimum and maximum values of the ecosystem services by LULC is given in Tables S2.1., S2.2., and S2.3., respectively. The median, maximum and minimum values for provisioning services of croplands, shown in the same tables, are based on net cropland values per hectare compiled from FAOSTAT database. Cropland values are given for comparison purposes based on their values from across the Sahel, whereas in the actual analysis country-and-year specific cropland values are used. Provisioning ecosystem services make up from 2% to 99% of the total services depending on the biome. The highest share of provisioning services is consistently with croplands.

**Table S2.1. Median values of ecosystem services in the Sahel region, (USD 2007 per hectares)**

| **Ecosystem services** | **Forests** | **Woodlands and Shrublands** | **Grassland** | **Wetlands** | **Cropland** | **Barren land** |
| --- | --- | --- | --- | --- | --- | --- |
| **Provisioning services** | **284** | **192** | **49** | **423** | ***280*** | **0** |
| Food | 132 | 33 | 36 | 25 |  |  |
| Water | 33 |  |  | 257 |  |  |
| Raw materials | 76 | 42 | 12 | 16 |  | 0 |
| Genetic resources | 38 | 25 |  | 68 |  |  |
| Medicinal resources | 5 | 2 | 1 | 46 |  |  |
| Ornamental resources |  | 90 |  | 11 |  |  |
| **Regulating services** | **1838** | **216** | **316** | **2664** | **38** | **0** |
| Air quality regulation | 14 |  | 23 | 67 |  |  |
| Climate regulation | 1343 | 49 | 75 | 109 | 2 |  |
| Disturbance moderation |  |  |  |  |  |  |
| Regulation of water flows | 55 | 33 |  |  | 19 |  |
| Waste treatment | 153 |  |  | 2206 | 4 |  |
| Erosion prevention | 221 | 104 | 140 | 179 | 2 |  |
| Nutrient cycling | 19 | 10 | 78 | 103 |  |  |
| Pollination | 19 | 19 |  |  | 9 |  |
| Biological control | 14 | 1 |  |  | 2 |  |
| **Habitat services** | **24** | **215** | **0** | **45** | **0** | **0** |
| Nursery service | 8 |  |  | 29 |  |  |
| Genetic diversity | 16 | 215 |  | 16 |  |  |
| **Cultural services** | **6** | **6** | **5** | **55** | **1** | **0** |
| Esthetic information |  |  |  |  |  |  |
| Recreation | 6 | 6 | 5 | 12 | 1 |  |
| Inspiration |  |  |  |  |  |  |
| Spiritual experience |  |  |  | 41 |  |  |
| Cognitive development |  |  |  | 2 |  |  |
| **Total** | **2152** | **629** | **370** | **3187** | **319** | **0** |

**Table S2.2. Minimum values of ecosystem services in the Sahel region, (USD 2007 per hectares)**

| **Ecosystem services** | **Forests** | **Woodlands and Shrublands** | **Grassland** | **Wetlands** | **Cropland** | **Barren land** |
| --- | --- | --- | --- | --- | --- | --- |
| **Provisioning services** | **139** | **133** | **5** | **84** | **72** | **0** |
| Food | 103 | 1 | 3 | 1 |  |  |
| Water | 8 |  |  | 2 |  |  |
| Raw materials | 19 | 15 | 1 | 1 |  | 0 |
| Genetic resources | 8 | 25 |  | 68 |  |  |
| Medicinal resources | 1 | 2 | 1 | 1 |  |  |
| Ornamental resources |  | 90 |  | 11 |  |  |
| **Regulating services** | **412** | **158** | **237** | **166** | **8** | **0** |
| Air quality regulation | 14 |  | 23 | 67 |  |  |
| Climate regulation | 132 | 3 | 8 | 11 | 2 |  |
| Disturbance moderation |  |  |  |  |  |  |
| Regulation of water flows | 6 | 21 |  |  | 1 |  |
| Waste treatment | 119 |  |  | 1 | 1 |  |
| Erosion prevention | 115 | 104 | 128 | 81 | 2 |  |
| Nutrient cycling | 6 | 10 | 78 | 6 |  |  |
| Pollination | 14 | 19 |  |  | 1 |  |
| Biological control | 6 | 1 |  |  | 1 |  |
| **Habitat services** | **11** | **1** | **0** | **24** | **0** | **0** |
| Nursery service | 7 |  |  | 8 |  |  |
| Genetic diversity | 4 | 1 |  | 16 |  |  |
| **Cultural services** | **1** | **6** | **1** | **22** | **1** | **0** |
| Esthetic information |  |  |  |  |  |  |
| Recreation | 1 | 6 | 1 | 1 | 1 |  |
| Inspiration |  |  |  |  |  |  |
| Spiritual experience |  |  |  | 19 |  |  |
| Cognitive development |  |  |  | 2 |  |  |
| **Total** | **563** | **298** | **243** | **296** | **81** | **0** |

**Table S2.3. Maximum values of ecosystem services in the Sahel region, (USD 2007 per hectares)**

| **Ecosystem services** | Forests | Woodlands and Shrublands | Grassland | Wetlands | Cropland | Barren land |
| --- | --- | --- | --- | --- | --- | --- |
| **Provisioning services** | **998** | **370** | **183** | **8790** | **8627** | **0** |
| Food | 167 | 51 | 158 | 3859 |  |  |
| Water | 46 |  |  | 1000 |  |  |
| Raw materials | 599 | 197 | 24 | 3753 |  |  |
| Genetic resources | 94 | 25 |  | 68 |  |  |
| Medicinal resources | 92 | 7 | 1 | 99 |  |  |
| Ornamental resources |  | 90 |  | 11 |  |  |
| **Regulating services** | **4393** | **274** | **397** | **5283** | **117** | **0** |
| Air quality regulation | 14 |  | 23 | 67 |  |  |
| Climate regulation | 3097 | 95 | 143 | 780 | 2 |  |
| Disturbance moderation |  |  |  |  |  |  |
| Regulation of water flows | 345 | 45 |  |  | 48 |  |
| Waste treatment | 188 |  |  | 4119 | 7 |  |
| Erosion prevention | 524 | 104 | 153 | 156 | 3 |  |
| Nutrient cycling | 133 | 10 | 78 | 161 |  |  |
| Pollination | 51 | 19 |  |  | 30 |  |
| Biological control | 41 | 1 |  |  | 27 |  |
| **Habitat services** | **54** | **430** | **0** | **703** | **0** | **0** |
| Nursery service | 24 |  |  | 687 |  |  |
| Genetic diversity | 30 | 430 |  | 16 |  |  |
| **Cultural services** | **209** | **6** | **185** | **159** | **1** | **0** |
| Esthetic information |  |  |  |  |  |  |
| Recreation | 209 | 6 | 185 | 91 | 1 |  |
| Inspiration |  |  |  |  |  |  |
| Spiritual experience |  |  |  | 66 |  |  |
| Cognitive development |  |  |  | 2 |  |  |
| **Total** | **5654** | **1080** | **765** | **14935** | **8745** | **0** |

**Table S2.4. Costs of land restoration activities across the Sahel (USD 2007)**

| **Costs of action** | **Forest** | **Woodland** | **Shrubland** | **Wetland** | **Cropland** | **Grassland** |
| --- | --- | --- | --- | --- | --- | --- |
| **Establishment costs** | 645 | 154 | 154 | 5577 | 297 | 297 |
| **Maintenance costs** | 225 | 50 | 50 | 300 | 69 | 69 |
| **Survival rate** | 60% | 60% | 60% | 100% | 100% | 60% |
| **Establishment years** | 30 | 10 | 10 | 10 | 1 | 1 |

Sources: see Data section

## ***Supplementary Material 3.***

**Figure S3.1. Annual cost of land degradation, gains from land improvement and net changes in the TEV of ecosystems using minimum economic values for ecosystem services.**

**Figure S3.2. Annual cost of land degradation, gains from land improvement and net changes in the TEV of ecosystems using maximum economic values for ecosystem services.**

**Table S3.1. Dynamics of annual costs of land degradation by country across the Sahel region (median ecosystem values), million USD 2007.**

| **Countries** | **2002** | **2003** | **2004** | **2005** | **2006** | **2007** | **2008** | **2009** | **2010** | **2011** | **2012** | **2013** | **2014** | **2015** | **2016** | **2017** | **2018** |
| --- | --- | --- | --- | --- | --- | --- | --- | --- | --- | --- | --- | --- | --- | --- | --- | --- | --- |
| Burkina Faso | 3 | 43 | 15 | 3 | 1 | 161 | 8 | 68 | 4 | 57 | 5 | 3 | 2 | 33 | 1 | 11 | 6 |
| Chad | 125 | 95 | 262 | 69 | 160 | 43 | 72 | 374 | 44 | 1146 | 21 | 583 | 107 | 98 | 78 | 164 | 105 |
| Djibouti | 2 | 2 | 2 | 2 | 2 | 2 | 6 | 6 | 7 | 12 | 10 | 7 | 6 | 4 | 3 | 11 | 16 |
| Eritrea | 33 | 11 | 10 | 12 | 22 | 13 | 54 | 22 | 20 | 17 | 17 | 12 | 12 | 11 | 11 | 54 | 49 |
| Ethiopia | 524 | 628 | 480 | 321 | 542 | 661 | 445 | 454 | 464 | 467 | 425 | 448 | 398 | 467 | 782 | 990 | 1271 |
| Mali | 338 | 140 | 36 | 130 | 59 | 36 | 64 | 68 | 87 | 52 | 56 | 57 | 59 | 40 | 49 | 295 | 186 |
| Mauritania | 9 | 11 | 9 | 9 | 9 | 10 | 18 | 19 | 24 | 49 | 29 | 18 | 22 | 11 | 10 | 220 | 273 |
| Niger | 51 | 115 | 178 | 93 | 53 | 64 | 80 | 333 | 65 | 243 | 60 | 52 | 62 | 73 | 81 | 183 | 123 |
| Nigeria | 972 | 977 | 1031 | 922 | 1007 | 4010 | 794 | 1809 | 910 | 4656 | 824 | 761 | 629 | 854 | 1307 | 1760 | 1806 |
| Sudan | 296 | 65 | 43 | 489 | 304 | 63 | 247 | 351 | 90 | 52 | 744 | 61 | 51 | 426 | 40 | 208 | 154 |
| Senegal | 342 | 10 | 29 | 6 | 73 | 92 | 5 | 16 | 10 | 228 | 7 | 31 | 27 | 10 | 165 | 72 | 61 |
| **Sahel region** | **2823** | **2181** | **2160** | **2223** | **2322** | **5262** | **2052** | **3703** | **1858** | **7119** | **2463** | **2249** | **1657** | **2361** | **2681** | **4400** | **4442** |

## ***Supplementary Material 4.***

**Table S4.1. Costs of action vs Inaction by country under Scenario 1 (in millions USD 2007)**

| **Countries** |  | | |
| --- | --- | --- | --- |
| **Cost of inaction** | **Cost of Action** | **Returns from each $ invested in land restoration** |
| **Burkina Faso** | 254 | 535 | 0.47 |
| **Chad** | 1207 | 1317 | 0.92 |
| **Djibouti** | 276 | 146 | 1.89 |
| **Eritrea** | 549 | 340 | 1.61 |
| **Ethiopia** | 39335 | 23536 | 1.67 |
| **Mali** | 1384 | 1589 | 0.87 |
| **Mauritania** | 712 | 710 | 1.00 |
| **Niger** | 1148 | 1110 | 1.03 |
| **Nigeria** | 26514 | 11194 | 2.37 |
| **Sudan** | 2348 | 2902 | 0.81 |
| **Senegal** | 587 | 767 | 0.77 |
| **Sahel** | **74314** | **44148** | **1.68** |

Note: cost of inaction corresponds to cost of land degradation, while cost of action corresponds to cost of land restoration.

**Table S4.2. Costs of action vs Inaction by country under Scenario 2 (in millions USD 2007)**

| **Countries** |  | | |
| --- | --- | --- | --- |
| **Costs of inaction** | **Cost of Action** | **Returns from each $ invested in land restoration** |
| **Burkina Faso** | 952 | 566 | 1.68 |
| **Chad** | 2227 | 1340 | 1.66 |
| **Djibouti** | 180 | 113 | 1.60 |
| **Eritrea** | 338 | 251 | 1.34 |
| **Ethiopia** | 15171 | 16156 | 0.94 |
| **Mali** | 3150 | 1590 | 1.98 |
| **Mauritania** | 834 | 567 | 1.47 |
| **Niger** | 2085 | 1133 | 1.84 |
| **Nigeria** | 20272 | 8564 | 2.37 |
| **Sudan** | 4024 | 2630 | 1.53 |
| **Senegal** | 1222 | 768 | 1.59 |
| **Sahel** | **50453** | **33678** | **1.49** |

**Table S4.3. Costs of action vs Inaction by country under Scenario 3 (in millions USD 2007)**

| **Countries** |  | | |
| --- | --- | --- | --- |
| **Costs of inaction** | **Cost of Action** | **Returns from each $ invested in land restoration** |
| **Burkina Faso** | 1553 | 604 | 2.6 |
| **Chad** | 3872 | 1457 | 2.7 |
| **Djibouti** | 383 | 152 | 2.5 |
| **Eritrea** | 730 | 349 | 2.1 |
| **Ethiopia** | 33057 | 23266 | 1.4 |
| **Mali** | 5348 | 1898 | 2.8 |
| **Mauritania** | 1551 | 754 | 2.1 |
| **Niger** | 3632 | 1241 | 2.9 |
| **Nigeria** | 35159 | 10869 | 3.2 |
| **Sudan** | 7059 | 3150 | 2.2 |
| **Senegal** | 2087 | 922 | 2.3 |
| **Sahel** | **94430** | **44663** | **2.1** |

**Table S4.4. Costs of action vs Inaction by country under Scenario 4, (in millions USD 2007)**

| **Countries** | **Scenario 4** | | |
| --- | --- | --- | --- |
| **Costs of inaction** | **Cost of Action** | **Returns from each $ invested in land restoration** |
| **Burkina Faso** | 2416 | 647 | 3.7 |
| **Chad** | 6854 | 1517 | 4.5 |
| **Djibouti** | 904 | 162 | 5.6 |
| **Eritrea** | 1756 | 369 | 4.8 |
| **Ethiopia** | 87961 | 25088 | 3.5 |
| **Mali** | 9054 | 2100 | 4.3 |
| **Mauritania** | 3075 | 797 | 3.9 |
| **Niger** | 6452 | 1297 | 5.0 |
| **Nigeria** | 70661 | 12889 | 5.5 |
| **Sudan** | 12706 | 3347 | 3.8 |
| **Senegal** | 3586 | 1027 | 3.5 |
| **Sahel** | **205426** | **49240** | **4.2** |

**Table S4.5. Costs of action vs Inaction by country under Scenario 5, (in millions USD 2007)**

| **Countries** |  | | |
| --- | --- | --- | --- |
| **Costs of inaction** | **Cost of Action** | **Returns from each $ invested in land restoration** |
| **Burkina Faso** | 268 | 566 | 0.5 |
| **Chad** | 1329 | 1485 | 0.9 |
| **Djibouti** | 312 | 181 | 1.7 |
| **Eritrea** | 620 | 423 | 1.5 |
| **Ethiopia** | 45886 | 30821 | 1.5 |
| **Mali** | 1510 | 1790 | 0.8 |
| **Mauritania** | 795 | 852 | 0.9 |
| **Niger** | 1264 | 1264 | 1.0 |
| **Nigeria** | 31269 | 15441 | 2.0 |
| **Sudan** | 2593 | 3310 | 0.8 |
| **Senegal** | 645 | 865 | 0.7 |
| **Sahel** | **86491** | **56999** | **1.5** |

**Table S4.6. Costs of action vs Inaction by country under Scenario 6, (in millions USD 2007)**

| **Countries** |  | | |
| --- | --- | --- | --- |
| **Costs of inaction** | **Cost of Action** | **Returns from each $ invested in land restoration** |
| **Burkina Faso** | 278 | 587 | 0.5 |
| **Chad** | 1413 | 1619 | 0.9 |
| **Djibouti** | 337 | 209 | 2.5 |
| **Eritrea** | 669 | 490 | 2.1 |
| **Ethiopia** | 50763 | 37674 | 1.1 |
| **Mali** | 1598 | 1946 | 0.7 |
| **Mauritania** | 853 | 965 | 0.8 |
| **Niger** | 1345 | 1387 | 0.6 |
| **Nigeria** | 34897 | 20212 | 1.4 |
| **Sudan** | 2764 | 3627 | 0.7 |
| **Senegal** | 685 | 942 | 0.6 |
| **Sahel** | **108843** | **76270** | **1.4** |

**Table S4.7. Costs of action vs Inaction by country under Scenario 7, (in millions USD 2007)**

| **Countries** | **Costs of inaction** | **Cost of Action** | **Returns from each $ invested in land restoration** |
| --- | --- | --- | --- |
| **Burkina Faso** | 761 | 357 | 2.1 |
| **Chad** | 1104 | 901 | 1.2 |
| **Djibouti** | 42 | 68 | 0.6 |
| **Eritrea** | 141 | 190 | 0.7 |
| **Ethiopia** | 8040 | 6626 | 1.2 |
| **Mali** | 2633 | 963 | 2.7 |
| **Mauritania** | 148 | 342 | 0.4 |
| **Niger** | 533 | 851 | 0.6 |
| **Nigeria** | 18087 | 5742 | 3.2 |
| **Sudan** | 2717 | 1818 | 1.5 |
| **Senegal** | 1120 | 438 | 2.6 |
| **Sahel** | **36325** | **18295** | **1.93** |

**Table S4.8. Costs of action vs Inaction by country under Scenario 8, (in millions USD 2007)**

|  | **Costs of inaction** | **Cost of Action** | **Returns from each $ invested in land restoration** |
| --- | --- | --- | --- |
| **Burkina Faso** | 2,416 | 582 | 4.2 |
| **Chad** | 6,854 | 1,432 | 4.8 |
| **Djibouti** | 904 | 165 | 5.5 |
| **Eritrea** | 1,756 | 374 | 4.7 |
| **Ethiopia** | 84,353 | 24,827 | 3.4 |
| **Mali** | 6,193 | 1,628 | 3.8 |
| **Mauritania** | 3,075 | 811 | 3.8 |
| **Niger** | 6,452 | 1,280 | 5.0 |
| **Nigeria** | 48,722 | 11,991 | 4.1 |
| **Sudan** | 12,706 | 3,196 | 4.0 |
| **Senegal** | 4,248 | 1,117 | 3.8 |
| **Sahel** | **177,680** | **47,404** | **3.7** |

## ***Supplementary Material 5.***

**Table S5.1. Benefit-cost ratios of action by biome and country under Scenario 1**

|  | **Scenario 1, returns from each $ invested in restoration by biome** | | | | | |
| --- | --- | --- | --- | --- | --- | --- |
| **Country** | **Forest** | **Wetland** | **Woodland** | **Shrubland** | **Cropland** | **Grassland** |
| **Burkina Faso** | 3.6 | 2.9 | . | 1.1 | 0.8 | 0.4 |
| **Chad** | . | 2.4 | . | 2.1 | 0.7 | 0.5 |
| **Djibouti** | . | . | . | 4.7 | . | 0.7 |
| **Eritrea** | . | 3.3 | . | 3.9 | . | 0.6 |
| **Ethiopia** | 6.2 | 2.6 | 1.1 | 1.3 | 0.6 | 0.7 |
| **Mali** | 3.6 | 2.4 | 1.1 | 1.4 | 0.7 | 0.7 |
| **Mauritania** | . | 2.4 | . | 1.4 | . | 0.7 |
| **Niger** | . | 2.5 | . | 2.1 | 0.3 | 0.6 |
| **Nigeria** | 5.1 | 1.7 | 0.9 | 0.9 | 1.2 | 0.7 |
| **Sudan** | 3.6 | 2.8 | . | 2.0 | 0.6 | 0.5 |
| **Senegal** | 3.6 | 2.6 | 1.1 | 1.1 | 0.5 | 0.7 |
| **Sahel** | **5.4** | **2.2** | **0.9** | **1.4** | **0.9** | **0.5** |

**Table S5.2. Benefit-cost ratios of action by biome and country under Scenario 2**

|  | **Scenario 2, returns from each $ invested in restoration by biome** | | | | | |
| --- | --- | --- | --- | --- | --- | --- |
| **Country** | **Forest** | **Wetland** | **Woodland** | **Shrubland** | **Cropland** | **Grassland** |
| **Burkina Faso** | 0.6 | 1.1 | . | 0.7 | 2.5 | 1.7 |
| **Chad** | . | 1.0 | . | 1.1 | 2.2 | 1.9 |
| **Djibouti** | . | . | . | 2.3 | . | 2.5 |
| **Eritrea** | . | 1.2 | . | 1.9 | . | 2.4 |
| **Ethiopia** | 0.8 | 1.0 | 0.7 | 0.7 | 2.3 | 2.5 |
| **Mali** | 0.6 | 1.0 | 0.7 | 0.8 | 2.3 | 2.5 |
| **Mauritania** | . | 1.0 | . | 0.8 | . | 2.5 |
| **Niger** | . | 1.0 | . | 1.1 | 1.0 | 2.2 |
| **Nigeria** | 0.7 | 0.8 | 0.5 | 0.5 | 4.4 | 2.5 |
| **Sudan** | 0.6 | 1.1 | . | 1.1 | 1.9 | 1.9 |
| **Senegal** | 0.6 | 1.0 | 0.7 | 0.7 | 1.8 | 2.5 |
| **Sahel** | **0.7** | **0.9** | **0.6** | **0.8** | **3.3** | **2.0** |

**Table S5.3. Benefit-cost ratios of action by biome and country under Scenario 3**

| **Country** | **Scenario 3, returns from each $ invested in restoration by biome** | | | | | |
| --- | --- | --- | --- | --- | --- | --- |
| **Forest** | **Wetland** | **Woodland** | **Shrubland** | **Cropland** | **Grassland** |
| **Burkina Faso** | 1.0 | 2.9 | . | 1.1 | 3.3 | 2.6 |
| **Chad** | . | 2.4 | . | 2.1 | 2.9 | 2.9 |
| **Djibouti** | . | . | . | 4.7 | . | 3.7 |
| **Eritrea** | . | 3.3 | . | 3.9 | . | 3.6 |
| **Ethiopia** | 1.6 | 2.6 | 1.1 | 1.3 | 3.3 | 3.7 |
| **Mali** | 1.0 | 2.4 | 1.1 | 1.4 | 3.4 | 3.7 |
| **Mauritania** | . | 2.4 | . | 1.4 | . | 3.7 |
| **Niger** | . | 2.5 | . | 2.1 | 1.3 | 3.3 |
| **Nigeria** | 1.3 | 1.7 | 0.9 | 0.9 | 6.4 | 3.7 |
| **Sudan** | 1.0 | 2.8 | . | 2.0 | 2.6 | 2.9 |
| **Senegal** | 1.0 | 2.6 | 1.1 | 1.1 | 2.7 | 3.7 |
| **Sahel** | **1.4** | **2.2** | **0.9** | **1.4** | **4.8** | **3.0** |

**Table S5.4. Benefit-cost ratios of action by biome and country under Scenario 4**

| **Country** | **Scenario 4, returns from each $ invested in restoration by biome** | | | | | |
| --- | --- | --- | --- | --- | --- | --- |
| **Forest** | **Wetland** | **Woodland** | **Shrubland** | **Cropland** | **Grassland** |
| **Burkina Faso** | 3.6 | 9.8 | . | 3.0 | 4.1 | 3.8 |
| **Chad** | . | 7.8 | . | 5.2 | 3.6 | 4.1 |
| **Djibouti** | . | . | . | 11.0 | . | 5.1 |
| **Eritrea** | . | 11.4 | . | 9.1 | . | 5.0 |
| **Ethiopia** | 6.2 | 8.5 | 3.0 | 3.3 | 4.5 | 5.1 |
| **Mali** | 3.6 | 7.8 | 3.0 | 3.6 | 4.5 | 5.1 |
| **Mauritania** | . | 7.7 | . | 3.7 | . | 5.1 |
| **Niger** | . | 8.0 | . | 5.2 | 1.6 | 4.6 |
| **Nigeria** | 5.1 | 5.4 | 2.3 | 2.3 | 8.5 | 5.1 |
| **Sudan** | 3.6 | 9.1 | . | 4.9 | 3.2 | 4.1 |
| **Senegal** | 3.6 | 8.4 | 3.0 | 3.0 | 3.6 | 5.1 |
| **Sahel** | **5.4** | **7.1** | **2.5** | **3.6** | **6.4** | **4.3** |

**Table S5.5. Benefit-cost ratios of action by biome and country under Scenario 5**

| **Country** | **Scenario 5, returns from each $ invested in restoration by biome** | | | | | |
| --- | --- | --- | --- | --- | --- | --- |
| **Forest** | **Wetland** | **Woodland** | **Shrubland** | **Cropland** | **Grassland** |
| **Burkina Faso** | 2.6 | 2.4 | . | 1.0 | 0.8 | 0.4 |
| **Chad** | . | 2.0 | . | 1.8 | 0.7 | 0.5 |
| **Djibouti** | . | . | . | 4.0 | . | 0.7 |
| **Eritrea** | . | 2.7 | . | 3.3 | . | 0.6 |
| **Ethiopia** | 4.5 | 2.1 | 1.0 | 1.1 | 0.6 | 0.7 |
| **Mali** | 2.6 | 2.0 | 1.0 | 1.2 | 0.7 | 0.7 |
| **Mauritania** | . | 2.0 | . | 1.2 | . | 0.7 |
| **Niger** | . | 2.1 | . | 1.8 | 0.3 | 0.6 |
| **Nigeria** | 3.7 | 1.4 | 0.8 | 0.8 | 1.2 | 0.7 |
| **Sudan** | 2.6 | 2.2 | . | 1.7 | 0.6 | 0.5 |
| **Senegal** | 2.6 | 2.1 | 1.0 | 1.0 | 0.5 | 0.7 |
| **Sahel** | **3.9** | **1.8** | **0.8** | **1.2** | **0.9** | **0.5** |

**Table S5.6. Benefit-cost ratios of action by biome and country under Scenario 6**

| **Country** | **Scenario 6, returns from each $ invested in restoration by biome** | | | | | |
| --- | --- | --- | --- | --- | --- | --- |
| **Forest** | **Wetland** | **Woodland** | **Shrubland** | **Cropland** | **Grassland** |
| **Burkina Faso** | 2.0 | 2.0 | . | 0.9 | 0.8 | 0.4 |
| **Chad** | . | 1.8 | . | 1.7 | 0.7 | 0.5 |
| **Djibouti** | . | . | . | 3.6 | . | 0.7 |
| **Eritrea** | . | 2.3 | . | 3.0 | . | 0.6 |
| **Ethiopia** | 3.8 | 1.9 | 0.9 | 1.0 | 0.6 | 0.7 |
| **Mali** | 2.0 | 1.8 | 0.9 | 1.1 | 0.7 | 0.7 |
| **Mauritania** | . | 1.8 | . | 1.1 | . | 0.7 |
| **Niger** | . | 1.8 | . | 1.7 | 0.3 | 0.6 |
| **Nigeria** | 2.8 | 1.3 | 0.7 | 0.7 | 1.2 | 0.7 |
| **Sudan** | 2.0 | 2.0 | . | 1.6 | 0.6 | 0.5 |
| **Senegal** | 2.0 | 2.0 | 0.92 | 0.9 | 0.5 | 0.7 |
| **Sahel** | **3.0** | **1.6** | **0.76** | **1.1** | **0.9** | **0.5** |

**Table S5.7. Benefit-cost ratios of action by biome and country under Scenario 7**

| **Country** | **Scenario 7, returns from each $ invested in restoration by biome** | | | | | |
| --- | --- | --- | --- | --- | --- | --- |
| **Forest** | **Wetland** | **Woodland** | **Shrubland** | **Cropland** | **Grassland** |
| **Burkina Faso** | 0.1 | 0.2 | . | 0.7 | 2.3 | 0.3 |
| **Chad** | . | 0.2 | . | 0.7 | 2.0 | 0.3 |
| **Djibouti** | . | . | . | 0.9 | . | 0.3 |
| **Eritrea** | . | 0.2 | . | 0.8 | 1.0 | 0.3 |
| **Ethiopia** | 0.1 | 0.2 | 0.7 | 0.7 | 3.7 | 0.3 |
| **Mali** | 0.1 | 0.2 | 0.7 | 0.7 | 3.7 | 0.3 |
| **Mauritania** | . | 0.2 | . | 0.7 | 1.6 | 0.3 |
| **Niger** | . | 0.2 | . | 0.7 | 0.9 | 0.3 |
| **Nigeria** | 0.1 | 0.2 | 0.4 | 0.4 | 7.0 | 0.3 |
| **Sudan** | 0.1 | 0.2 | . | 0.7 | 1.8 | 0.3 |
| **Senegal** | 0.1 | 0.2 | 0.7 | 0.7 | 2.9 | 0.3 |
| **Sahel** | **0.1** | **0.2** | **0.5** | **0.7** | **3.8** | **0.3** |

**Table S5.8. Benefit-cost ratios of action by biome and country under Scenario 8**

| **Country** | **Scenario 8, returns from each $ invested in restoration by biome** | | | | | |
| --- | --- | --- | --- | --- | --- | --- |
| **Forest** | **Wetland** | **Woodland** | **Shrubland** | **Cropland** | **Grassland** |
| **Burkina Faso** | 3.5 | 9.8 | . | 3.0 | 2.1 | 4.2 |
| **Chad** | . | 8.0 | . | 5.1 | 1.8 | 4.4 |
| **Djibouti** | . | . | . | 10.8 | . | 4.9 |
| **Eritrea** | . | 11.4 | . | 8.9 | . | 4.9 |
| **Ethiopia** | 6.1 | 8.5 | 3.0 | 3.3 | 3.4 | 3.8 |
| **Mali** | 3.5 | 7.8 | 3.0 | 3.6 | 3.4 | 4.0 |
| **Mauritania** | . | 7.7 | . | 3.6 | . | 4.9 |
| **Niger** | . | 8.1 | . | 5.1 | 0.8 | 4.7 |
| **Nigeria** | 5.1 | 5.5 | 2.8 | 2.8 | 4.3 | 4.9 |
| **Sudan** | 3.5 | 9.1 | . | 4.9 | 1.6 | 4.4 |
| **Senegal** | 3.5 | 8.4 | 3.0 | 3.0 | . | 4.0 |
| **Sahel** | **5.4** | **7.2** | **2.8** | **3.6** | **4.3** | **4.2** |

## ***Supplementary Material 6.***

**Table S6.1. Benefit-cost ratios of restoring a degraded biome compared to its current use, Scenario 1**

| **2001** | **2018** | | | | | |
| --- | --- | --- | --- | --- | --- | --- |
| **Forest** | **Shrubland** | **Woodland** | **Grassland** | **Cropland** | **Barren** |
| Wetland | 0.9 | 1.9 | 1.9 | 2.4 | 2.6 | 3.8 |
| Forest |  | 9.2 | 9.2 | 3.6 | 1.9 |  |
| Shrubland |  |  |  | 1.1 | 0.9 | 7.3 |
| Woodland |  |  |  | 1.1 | 0.5 |  |
| Cropland |  |  |  | 0.9 |  | 1.9 |
| Grassland |  |  |  |  | 0.5 | 0.7 |

Note: Interpreted as benefit-cost ratio of restoring higher value biome in 2001 (horizontal list) degraded to lower value biome (vertical list) by 2018.

**Table S6.2. Benefit-cost ratios of restoring a degraded biome compared to its current use, Scenario 2**

| **2001** | **2018** | | | | | |
| --- | --- | --- | --- | --- | --- | --- |
| **Forest** | **Shrubland** | **Woodland** | **Grassland** | **Cropland** | **Barren** |
| Wetland | 0.5 | 0.9 | 0.9 | 1.0 | 1.0 | 1.3 |
| Forest |  | 1.1 | 1.1 | 0.6 | 0.3 |  |
| Shrubland |  |  |  | 0.7 | 0.6 | 3.4 |
| Woodland |  |  |  | 0.7 | 0.3 |  |
| Cropland |  |  |  | 3.3 |  | 5.9 |
| Grassland |  |  |  |  | 1.8 | 2.5 |

Note: Interpreted as benefit-cost ratio of restoring higher value biome in 2001 (horizontal list) degraded to lower value biome (vertical list) by 2018.

**Table S6.3. Benefit-cost ratios of restoring a degraded biome compared to its current use, Scenario 3**

| **2001** | **2018** | | | | | |
| --- | --- | --- | --- | --- | --- | --- |
| **Forest** | **Shrubland** | **Woodland** | **Grassland** | **Cropland** | **Barren** |
| Wetland | 0.9 | 1.9 | 1.9 | 2.4 | 2.6 | 3.8 |
| Forest |  | 2.3 | 2.3 | 1.0 | 0.6 |  |
| Shrubland |  |  |  | 1.1 | 0.9 | 7.3 |
| Woodland |  |  |  | 1.1 | 0.5 |  |
| Cropland |  |  |  | 4.8 |  | 7.9 |
| Grassland |  |  |  |  | 2.8 | 3.7 |

Note: Interpreted as benefit-cost ratio of restoring higher value biome in 2001 (horizontal list) degraded to lower value biome (vertical list) by 2018.

**Table S6.4. Benefit-cost ratios of restoring a degraded biome compared to its current use, Scenario 4**

| **2001** | **2018** | | | | | |
| --- | --- | --- | --- | --- | --- | --- |
| **Forest** | **Shrubland** | **Woodland** | **Grassland** | **Cropland** | **Barren** |
| Wetland | 2.6 | 6.0 | 6.0 | 7.7 | 8.6 | 13.3 |
| Forest |  | 9.2 | 9.2 | 3.6 | 1.9 |  |
| Shrubland |  |  |  | 3.0 | 2.4 | 17.0 |
| Woodland |  |  |  | 3.0 | 1.4 |  |
| Cropland |  |  |  | 6.4 |  | 9.8 |
| Grassland |  |  |  |  | 4.0 | 5.1 |

Note: Interpreted as benefit-cost ratio of restoring higher value biome in 2001 (horizontal list) degraded to lower value biome (vertical list) by 2018.

**Table S6.5. Benefit-cost ratios of restoring a degraded biome compared to its current use, Scenario 5**

| **2001** | **2018** | | | | | |
| --- | --- | --- | --- | --- | --- | --- |
| **Forest** | **Shrubland** | **Woodland** | **Grassland** | **Cropland** | **Barren** |
| Wetland | 0.8 | 1.6 | 1.6 | 2.0 | 2.1 | 3.0 |
| Forest |  | 6.6 | 6.6 | 2.6 | 1.4 |  |
| Shrubland |  |  |  | 1.0 | 0.8 | 6.2 |
| Woodland |  |  |  | 1.0 | 0.4 |  |
| Cropland |  |  |  | 0.9 |  | 1.9 |
| Grassland |  |  |  |  | 0.5 | 0.7 |

Note: Interpreted as benefit-cost ratio of restoring higher value biome in 2001 (horizontal list) degraded to lower value biome (vertical list) by 2018.

**Table S6.6. Benefit-cost ratios of restoring a degraded biome compared to its current use, Scenario 6**

|  | **Scenario 6** | | | | | |
| --- | --- | --- | --- | --- | --- | --- |
| **2001** | **2018** | | | | | |
| **Forest** | **Shrubland** | **Woodland** | **Grassland** | **Cropland** | **Barren** |
| Wetland | 0.7 | 1.4 | 1.4 | 1.6 | 1.8 | 2.6 |
| Forest |  | 4.9 | 4.9 | 2.0 | 1.1 |  |
| Shrubland |  |  |  | 0.9 | 0.7 | 5.6 |
| Woodland |  |  |  | 0.9 | 0.7 |  |
| Cropland |  |  |  | 0.9 |  | 1.9 |
| Grassland |  |  |  |  | 0.5 | 0.7 |

Note: Interpreted as benefit-cost ratio of restoring higher value biome in 2001 (horizontal list) degraded to lower value biome (vertical list) by 2018.

**Table S6.7. Benefit-cost ratios of restoring a degraded biome compared to its current use, Scenario 7**

|  | **Scenario 7** | | | | | |
| --- | --- | --- | --- | --- | --- | --- |
| **2001** | **2018** | | | | | |
| **Forest** | **Shrubland** | **Woodland** | **Grassland** | **Cropland** | **Barren** |
| Wetland | 0.1 | 0.2 | 0.2 | 0.2 | 0.1 | 0.2 |
| Forest |  | 0.1 | 0.1 | 0.1 | 0.0 |  |
| Shrubland |  |  |  | 0.7 | 0.2 | 1.0 |
| Woodland |  |  |  | 0.7 | 0.1 |  |
| Cropland |  |  |  | 3.8 |  | 5.9 |
| Grassland |  |  |  |  |  | 0.3 |

Note: Interpreted as benefit-cost ratio of restoring higher value biome in 2001 (horizontal list) degraded to lower value biome (vertical list) by 2018.

**Table S6.8. Benefit-cost ratios of restoring a degraded biome compared to its current use, Scenario 8**

|  | **Scenario 8** | | | | | |
| --- | --- | --- | --- | --- | --- | --- |
| **2001** | **2018** | | | | | |
| **Forest** | **Shrubland** | **Woodland** | **Grassland** | **Cropland** | **Barren** |
| Wetland | 2.6 | 6.0 | 6.0 | 7.7 | 10.2 | 13.3 |
| Forest |  | 9.0 | 9.0 | 3.5 | 3.1 |  |
| Shrubland |  |  |  | 3.0 | 4.1 | 16.5 |
| Woodland |  |  |  | 3.0 | 2.5 |  |
| Cropland |  |  |  | 4.3 |  | 4.9 |
| Grassland |  |  |  |  | 4.1 | 4.9 |

Note: Interpreted as benefit-cost ratio of restoring higher value biome in 2001 (horizontal list) degraded to lower value biome (vertical list) by 2018.

## ***Supplementary Material 7.***

**Table S7.1. Definition of biomes used in the study**

| **Biome** | **International Geosphere-Biosphere Programme (IGBP) definition** |
| --- | --- |
| Forests | Woody vegetation with height >2m & covering at least 60% of land area. |
| Woodland | Biome with tree cover of 30-60% (canopy > 2m) |
| Shrubland | Dominated by woody perennials (1-2m height) > 10% cover. |
| Grassland | Lands with herbaceous types of cover. Tree and shrub cover is less than 30%. |
| Cropland | Lands covered with temporary crops followed by harvest and a bare soil period (e.g., single and multiple cropping systems). Note, perennial woody crops are classified as forest or shrubland. At least 60% of area is cultivated cropland. |
| Barren lands | Barren or sparsely vegetated (bare soil and rocks). Lands with exposed soil, sand or rocks, with less than 10% vegetated cover throughout the year |
| Wetland | Lands with a permanent mixture of water and herbaceous or woody vegetation. The vegetation can be present either in salt, brackish, or fresh water |

For more definitions, please see http://earthobservatory.nasa.gov/Experiments/Biome/vocabulary.php

## ***Supplementary material 8***

**Assumptions for land restoration activities**

|  | **Forest** | **Woodland** | **Shrubland** | **Wetland** | **Cropland** | **Grassland** |
| --- | --- | --- | --- | --- | --- | --- |
| **Establishment period** | 30 | 10 | 10 | 10 | 1 | 1 |
| **Staggered entrance into full potential of ecosystem service provision** | First 5 years (20% of the full potential), 2nd 5 years (33% of potential), next 10 years (50 of potential), next 5 years (80% of potential) | First 5 years (50% of the full potential), 2nd 5 years (80% of potential) | First 5 years (50% of the full potential), 2nd 5 years (80% of potential) | First 5 years (50% of the full potential), 2nd 5 years (80% of potential) | Full potential is reached one year after restoration | Full potential is reached one year after restoration |
|  |  |  |  |  |  |  |
|  |  |  |  |  |  |  |
|  |  |  |  |  |  |  |

**Supplementary material 9**

**List references from which ecosystem values were compiled**

1. Abdrabo, M. (2009) Economic valuation of wetland ecosystem. Case study: Lake Maryuit, Egypt. Centre for Environment and Development for the Arab Region and Europe (CEDARE)
2. Acharaya, G. and E.B. Barbier (2000) Valuing groundwater recharge through agricultural production in the Hadejia-Nguru wetlands in northen Nigeria. Agricultural Economics 22(3): 247-259.
3. Adamu, A., Yacob, M.R., Radam, A., Hashim, R., Adam, S.U. (2015) Economic valuation of ecotourism resources in Yankari game reserve, Bauchi Nigeria. Procedia Environmental Sciences 30 ( 2015 ) 139 – 144
4. Adekola, O., Mitchell, G., & Grainger, A. (2015) Inequality and ecosystem services: The value and social distribution of Niger Delta wetland services. Ecosystem Services, 12, 42–54.
5. Adekola, O., S. Moradet, R. de Groot and F. Grelot (2008) The economic and livelihood value of provisioning services of Ga-Mampa wetland, South Africa. In: 13th IWRA World Water congress, 1 - 4 September, 2008, Montpellier, France.
6. Adekunle, M.F., Agbaje, B.M. (2012) Public willingness to pay for ecosystem service functions of a peri-urban forest near Abeokuta, Ogun State, Nigeria. Journal of Development and Agricultural Economics Vol. 4(2), pp. 45-50
7. Adekunle, M.F., Momoh, S., Agbaje, B.M. (2008) Valuing urban forests: the application of contingent valuation methods. Ethiopian Journal of Environmental Studies and Management Vol.1 No.2 June
8. Adekunle, VAJ (2006) Conservation of tree species diversity in tropical rainforest ecosystem of South-West Nigeria. JSTOR
9. Adjognon, G.S., van Soest, D., Guthoff, J. (2019) Reducing Hunger with Payments for Ecosystem Services (PES): Experimental Evidence from Burkina Faso
10. Agúndez, D., Lawali, S., Mahamane, A., Alía, R., Soliño, M. (2018) Consumer Preferences for Baobab Products and Implication for Conservation and Improvement Policies of Forest Food Resources in Niger (West Africa). Economic Botany
11. Allsopp, M. H., de Lange, W. J., & Veldtman, R. (2008) Valuing Insect Pollination Services with Cost of Replacement. PLoS ONE, 3(9), e3128. doi:10.1371/journal.pone.0003128
12. Amare, D., Mekuria, W., Belay, B. (2016) Perception of local community and the willingness to pay to restore church forests: the case of Dera district, northwestern Ethiopia. Forests, Trees and Livelihoods, 2164-3075
13. Amare, D., Mekuria, W., Belay, B. (2017) Willingness and participation of local communities to manage communal grazing lands in the Lake Tana Biosphere, Ethiopia. Society & Natural Resources. 30:6, 674-689
14. Anderson, S. et al (2017) Ecosystem service valuations of South Africa using a variety of land cover data sources and resolutions, Ecosystem Services 27 (173-178)
15. Antle, J.M., Stoorvogel, J.J. (2008) Agricultural carbon sequestration, poverty, and sustainability. Environment and Development Economics.
16. Arabomen, O.J., Chirwa, P.W., Babalola, F.D. (2019) Willingness-to-pay for environmental services provided by trees in core and fringe areas of Benin City, Nigeria. International Journal of Forestry Research
17. Araia, M.G. (2005) Revealing the forest hidden value: The case study of Eritrea
18. Arntzen, J. (1998) Economic valuation of communal rangelands in Botswana: a case study. IIED, London, UK.
19. Arowolo, A. et al (2018) Assessing changes in the value of ecosystem services in response to land-use/land-cover dynamics in Nigeria. Science of the Total Environment 636, 597-609
20. Arowolo, A.O., Agbonlahor, M. U., Okuneye, P. A., Soaga, J. A. (2014) Adopting a participatory approach to community forests management in rural Nigeria. Global NEST Journal, Vol 16, No 5, pp 975-987
21. Ayanlade, A., Proske, U. (2016) Assessing wetland degradation and loss of ecosystem services in the Niger Delta, Nigeria. Marine and Freshwater Research, CSIRO
22. Ayenew, B., Belay, A., Tesfay, Y. (2005) Economic Value of Wondo Genet Catchment Forest in Domestic Water Supply Services, Southern Ethiopia. Journal of Economics and Sustainable Development. Vol.6, No.9, 2015
23. Ayeni, A. O., Ogunsesan, A.A., Adekola, O.A. (2019) Provisioning ecosystem services provided by the Hadejia Nguru Wetlands, Nigeria – Current status and future priorities. Scientific African, 2019 - Elsevier
24. Barbier, E.B., W.M. Adams and K. Kimmage (1991) Economic valuation of wetland benefits: the Hadejia-Jama floodplain, Nigeria. IIED, London, UK.
25. Barnes, J.I. (2002) The economic returns to wildlife management in Southern Africa. In: Pearce, D., C. Pearce and C. Palmer (ed), "The valuing the environment in developing countries: case studies". Cheltenham, UK and Northampton, MA, USA.
26. Barrow, E. and H. Mogaka (2007) Kenya’s drylands: wastelands or an undervalued national economic resource. IUCN, Nairobi, Kenya.
27. Bayliss, J., Schaafsma, M., Balmford, A., Burgess, N. D., Green, J. M. H., Madoffe, S. S., … Yu, D. W. (2014) The current and future value of nature-based tourism in the Eastern Arc Mountains of Tanzania. Ecosystem Services, 8, 75–83. doi:10.1016/j.ecoser.2014.02.006
28. Beauchamp, E., Ingram, V. (2011) Impacts of community forests on livelihoods in Cameroon: lessons from two case studies. International Forestry Review Vol.13(4)
29. Bello, V.A., Audu, A.F., Ezeokoli, N.B. (2016) Tenants’ Willingness to Pay for Landscaping Features in Alagbaka Government Reservation Area of Akure, Nigeria. Journal of Sustainable Development Studies. Volume 9, Number 1, 2016, 1-16
30. Berhanu, G. (2012) Valuation of Choke Mountain Range Wetland Ecosystem, East Gojjam, Amhara Region, Ethiopia: Application of Choice Experiment Valuation Method
31. Bidak et al (2015) Goods and services provided by native plants in desert ecosystems: Examples from the northwestern coastal desert of Egypt. Global Ecology and Conservation Volume 3, January 2015, Pages 433-447"
32. Binet et al (2013) First international payment for marine ecosystem services:The case of the Banc d’Arguin National Park, Mauritania"
33. Bogale, A. (2011) Valuing Natural Forest Resources: An Application of Contingent Valuation Method on Adaba-Dodola Forest Priority Area, Bale Mountains, Ethiopia. Journal of Sustainable Forestry, 30(6), 518–542.
34. Brading et al (2009) Biodiversity Economics: The Value of Pollination Services to Egypt. Egyptian Journal of Biology, 2009, Vol. 11, pp 46-51
35. Brown, G. and W. Henry (1993) The viewing value of elephants. In: Barbier, B. (ed), "Economics and Ecology: New Frontiers and Sustainable Development". Chapman & Hall, London: 146-155.
36. Bruner et al (2015) Tourists’ Willingness to Pay to Visit Tanzania’s National Parks: A Contingent Valuation Study. N 9
37. Buscher, B. (2012) Payments for Ecosystem Services as Neoliberal Conservation: (Reinterpreting) Evidence from the Maloti-Drakensberg, South Africa. JSTOR, Conservation and Society
38. Campbell et al (1997) Local-Level Valuation of Savanna Resources: A Case Study from Zimbabwe. Economic Botany, Vol. 51, No. 1 (Jan. - Mar., 1997), pp. 59-77
39. Campos, P., Daly-Hassen, H., Oviedo, J. L., Ovando, P., & Chebil, A. (2008) Accounting for single and aggregated forest incomes: Application to public cork oak forests in Jerez (Spain) and Iteimia (Tunisia). Ecological Economics, 65(1), 76–86. doi:10.1016/j.ecolecon.2007.06.001
40. Carodenuto, S., Merger, E., Essomba, E., Panev, M., Pistorius, T., Amougou, J. (2015) A methodological framework for assessing agents, proximate drivers and underlying causes of deforestation: Field test results from Southern Cameroon. Forests 2015, 6, 203-224
41. Cheikh Oumar, B. A.et al (2000) The Economic Value of Wild Resources in Senegal. A preliminary evaluation of non-timber forest products, game and freshwater fisheries
42. Chisholm, R. (2010) Trade-offs between ecosystem services: Water and carbon in a biodiversity hotspot. Ecological Economics 69 (2010) 1973-1987
43. Chukwuone N.A., Okorji C.E. (2008) Willingness to pay for systematic management of community forests for conservation of non-timber forest products in Nigeria's rainforest region. Economics of Poverty, Environment and NaturalResource Use, 117-137
44. Cilliers et al (2013) Ecosystem services of urban green spaces in African countries—perspectives and challenges. Urban ecosystem 16, 681-702
45. Conchedda, G., Lambin, E. F., & Mayaux, P. (2011) Between Land and Sea: Livelihoods and Environmental Changes in Mangrove Ecosystems of Senegal. Annals of the Association of American Geographers, 101(6), 1259–1284.
46. Cowling, R.M., R. Costanza and S.I. Higgins (1997) Services supplied by South African fynbos ecosystems. In: Daily, G. (ed), "Ecosystem services: their nature and value". Island Press, Washington, D.C., USA.
47. Croitoru, L. (2007) How much are Mediterranean forests worth? Forest Policy and Economics, 9(5), 536–545. doi:10.1016/j.forpol.2006.04.001
48. Damnyag, L., Tyynelä, T., Appiah, M., Saastamoinen, O., & Pappinen, A. (2011) Economic cost of deforestation in semi-deciduous forests — A case of two forest districts in Ghana. Ecological Economics, 70(12), 2503–2510. doi:10.1016/j.ecolecon.2011.08.012
49. Diafas et al (2017) Measurement of Bequest Value Using a Non-monetary Payment in a Choice Experiment—The Case of Improving Forest Ecosystem Services for the Benefit of Local Communities in Rural Kenya
50. Dikgang et al (2011) The valuation of biodiversity conservation by the South African Khomani San “bushmen” community
51. Din, N., Saenger, P., Jules, P.R., Siegfried, D.D., Basco, F. (2008) Logging activities in mangrove forests: A case study of Douala Cameroon. African Journal of Environmental Science and Technology Vol. 2 (2), pp. 022-030
52. Dumenu, W. K. (2013) What are we missing? Economic value of an urban forest in Ghana. Ecosystem Services, 5, 137–142. doi:10.1016/j.ecoser.2013.07.001
53. Egoh et al (2010) Safeguarding Biodiversity and Ecosystem Services in the Little Karoo, South Africa. Conservation Biology, 24(4), 1021-1013
54. El Tahir, B.A. (2015) Climate Change Adaptation through Sustainable Forest Management in Sudan: Needs to Qualify Agroforestry Application. Sudan Academy of Sciences Journal-Special Issue (Climate Change), Vol. 11, 2015, 162-185
55. El-Bekkay et al (2013) An economic assessment of the Ramsar site of Massa (Morocco) with travel cost and contingent valuation methods
56. Emerton, L (ed) (2005) Values and rewards: counting and capturing ecosystem water services for sustainable development. IUCN Water, Nature and Economics Technical Paper No. 1, IUCN — The World Conservation Union, Ecosystems and Livelihoods Group Asia.
57. Emerton, L. (1998) Djibouti biodiversity - economic assessment. IUCN, Gland, Switzerland.
58. Emerton, L. (1998) Mont Kenya: the economics of community conservation. Institute for Development Policy and Management, University of Manchester, UK.
59. Emerton, L. (1999) Balancing the opportunity costs of wildlife conservation for communities around Lake Mburo National Park, Uganda. Working paper, Institute for Development Policy and Management, University of Manchester, UK.
60. Emerton, L. and A. Asrat (1998) Eritrea biodiversity - economic assessment. IUCN, Gland, Switzerland.
61. Emerton, L. and E. Muramira (1999) Uganda biodiversity - economic assessment. Prepared with National Environment Management Authority, Kampala. IUCN, Gland, Switzerland.
62. Emerton, L. and Y. Tessema (2001) Marine protected areas: the case of Kisite Marine National Park and Mpunguti Marine National Reserve, Kenya. IUCN Eastern Africa Regional Office, Nairobi, Kenya.
63. Emerton, L., L. Iyango, P. Luwum and A. Malinga (1998) The present economic value of Nakivubo Urban Wetland, Uganda. National Wetlands Conservation and Management Programme; IUCN: Biodiversity economics for Eastern Africa.
64. Endalew, B., & Assefa Wondimagegnhu, B. (2019) Determinants of households’ willingness to pay for the conservation of church forests in northwestern Ethiopia: A contingent valuation study. Cogent Environmental Science, 5(1).
65. Ezebilo, E.E., Mattsson, L., Afolami, C.A. (2010) Economic value of ecotourism to local communities in the Nigerian rainforest zone. Journal of sustainable development
66. Favretto, N. (2017) Evaluating ecosystem services in semi-arid rangelands through stochastic simulation
67. Faye, M. D., Weber, J. C., Mounkoro, B., Dakouo, J. M. (2010) Contribution of parkland trees to farmers’ livelihoods: a case study from Mali. Development in Practice, Volume 20
68. Fisher et al (2011) Measuring, Modeling and Mapping Ecosystem Services in the Eastern Arc Mountains of Tanzania. Progress in Physical Geography, vol 35, number 5, p 595 - 611
69. Gashaw, T., Tulu, T., Argaw, M., Worqlul, A. W., Tolessa, T., & Kindu, M. (2018) Estimating the impacts of land use/land cover changes on Ecosystem Service Values: The case of the Andassa watershed in the Upper Blue Nile basin of Ethiopia. Ecosystem Services, 31, 219–228.
70. Girma, H. M., Hassan, R. M., & Hertzler, G. (2012) Forest conservation versus conversion under uncertain market and environmental forest benefits in Ethiopia: The case of Sheka forest. Forest Policy and Economics, 21, 101–107.
71. Gowdy, J., Lang, H. (-) The Economic, Cultural and Ecosystem Values of the Sudd Wetland in South Sudan
72. Gren, I.M. and T. Soderqvist (1994) Economic valuation of wetlands: a survey. Beijer International Institute of Ecological Economics. Beijer Discussion Paper series No. 54, Stockholm, Sweden.
73. Heubach, K., Wittig, R., Nuppenau, E.-A., & Hahn, K. (2011) The economic importance of non-timber forest products (NTFPs) for livelihood maintenance of rural west African communities: A case study from northern Benin. Ecological Economics, 70(11), 1991–2001. doi:10.1016/j.ecolecon.2011.05.015
74. High, C. and C.M. Shackleton (2000) The comparative value of wild and domestic plants in home gardens of a South African rural village. Agroforestry Systems 48(2): 141-156.
75. Ilahe, H. et al (2015) Application of the contingent valuation method to agricultural landscapes in the Central West of Tunisia. International Journal of Scientific & Engineering Research, Volume 6, Issue 5, May-2015
76. Ingram et al (2012) Evidence of Payments for Ecosystem Services as a mechanism for supporting biodiversity conservation and rural livelihoods. Ecosystem Services
77. International Resources Groups Ltd. (2000) The case of Duru Haitemb community-based forest management project Babat District, Arusha Region, Tanzania. USAID, Tanzania.
78. Jean Hugues, N. (2011) The economic value of Congo basin protected areas goods and services. Journal of sustainable development. Vol. 4, No. 1
79. Kairo, J. (2010) Net Pay: Economic Analysis of a Replanted Mangrove Plantation in Kenya. Journal of Sustainable Forestry. Volume 28, Issue 3 - 5, Pages 395-414
80. Kakuru, W., Turyahabwe, N., & Mugisha, J. (2013) Total Economic Value of Wetlands Products and Services in Uganda. The Scientific World Journal, 2013, 1–13. doi:10.1155/2013/192656
81. Karanja, F., L. Emerton, J. Mafumbo and W. Kakuru (2001) Assessment of the economic value of pallisa district wetlands, Uganda. Biodiversity Economics for Eastern Africa & Uganda's National Wetlands Programme, IUCN Eastern Africa Programme.
82. Kasina, J. M., Mburu, J., Kraemer, M., & Holm-Mueller, K. (2009) Economic Benefit of Crop Pollination by Bees: A Case of Kakamega Small-Holder Farming in Western Kenya
83. Kasthala, G., A. Hepelwa, H. Hamiss, E. Kwayu, L. Emerton, O. Springate-Baginski, D. Allen, and W. Darwall (2008) An integrated assessment of the biodiversity, livelihood and economic value of wetlands in Mtanza-Msona Village, Tanzania. Tanzania Country Office, International Union for Conservation of Nature, Dar es Salaam.
84. Kindu, M., Schneider, T., Teketay, D., & Knoke, T. (2016) Changes of ecosystem service values in response to land use/land cover dynamics in Munessa–Shashemene landscape of the Ethiopian highlands. Science of The Total Environment, 547, 137–147
85. King-Okumu et al (2016) Direct use values of climate-dependent ecosystem services in Isiolo County, Kenya
86. Kitoto, P.A.O. (2018) Assessment of local residents' willingness to pay for the restoration of Lake Chad. Revue d'économie politique. 2018/6 (Vol. 128) , pages 1175 to 1198
87. Kometa, S.S. (2013) Wetlands exploitation along the Bafoussam–Bamenda road axis of the Western Highlands of Cameroon. Journal of Human Ecology, 41(1): 25-32 (2013)
88. Kramer, R.A., D.D. Richter, S. Pattanayak and N.P. Sharma (1997) Ecological and Economic Analysis of Watershed Protection in Eastern Madagascar. Journal of Environmental Management 49: 277-295.
89. Kramer, R.A., N.P. Sharma and M. Munashinghe (1995) Valuing tropical forests: Methodology and case study of Madagascar. World Bank Environment Paper 13.
90. Krutilla, J.V. (1991) Environmental resource services of Malaysian moist tropical forest. Johns Hopkins University Press, for Resources for the Future, Baltimore, USA.
91. Kung'u et al (2008) Potential of smallholder tree farmers in Africa's arid and semi arid lands (ASALS) participating in carbon trade
92. Kuwawenaruwa, A., Lokina, R. (2010) Economic valuation of consumptive nontimber forest products: Evidence from Rombo district using contingent valuation method. Vol. 80 No. 2 (2010)
93. Lescuyer, G. (2007) Valuation techniques applied to tropical forest environmental services: rationale, methods and outcomes. Paper presented at the West and Central Africa Tropical Forest Investment Forum2007; Accra, Ghana" CIRAD/CIFOR, Yaoundé, Cameroon.
94. Leßmeister, A., Heubach, K., Lykke, A. M., Thiombiano, A., Wittig, R., & Hahn, K. (2016) The contribution of non-timber forest products (NTFPs) to rural household revenues in two villages in south-eastern Burkina Faso. Agroforestry Systems, 92(1), 139–155.
95. Loth, P. (ed) (2004) The return of the water restoring the Waza Logone floodplain in Cameroon. IUCN, Gland, Switzerland and Cambridge, UK.
96. Luoga et al (2000) Economics of charcoal production in miombo woodlands of eastern Tanzania: some hidden costs associated with commercialization of the resources. Vol 35, Issue 2, Pages 243 - 257
97. Ly, O.K., J.T. Bishop, D. Moran and M. Dansohho (2006) Estimating the Value of Ecotourism in the Djoudj National Bird Park in Senegal. IUCN, Gland, Switzerland, 34pp.
98. Maclean, I.M.D., R. Tinch, M.H. Hassall and R. Boar (2003) Towards optimal use of tropical wetlands: An economic valuation of goods derived from papyrus swamps in Southwest Uganda. GSERGE Working Paper ECM 03-10, UK Economics and Social Research Council.
99. Maille, P. and R. Mendelsohn (1993) Valuing ecotourism in Madagascar. Joural of Environmental Management 38: 213-218.
100. Mathieu, L.F., I.H. Langford, W. Kenyon (2003) Valuing marine parks in a developing country: a case study of the Seychelles. Environment and Development Economics 8(2): 373-390.
101. Mekonnen, A. (2000) Valuation of community forestry in Ethiopia: a contingent valuation study of rural households. Environment and Development Economics, 5(3), 289–308
102. MEN Taha, Pretzsch, J., ME Siddig, THH Deafalla (2018) Valuation of the Environmental Role of Acacia senegal Tree in the Gum Belt of Kordofan and the Blue Nile Sectors, Sudan, 2018 - Elsevier
103. Mladenow et al (2007) The value of wildlife-viewing tourism as an incentive for conservation of biodiversity in the Okavango Delta, Botswana. Journal Development Suthern Africa. Vol 24, Issue 3
104. Mmom, P. C., Arokoyu S. B. (2010) Mangrove Forest Depletion, Biodiversity Loss and Traditional Resources Management Practices in the Niger Delta, Nigeria. Research Journal of Applied Sciences, Engineering and Technology 2(1): 28-34, 2010
105. Mmopelwa, G., J.N. Blignaut and R. Hassan (2009) Direct use values of selected vegetation resources in the Okavango Delta Wetland. South African Journal of Economic and Management Sciences 12(2): 242-255.
106. Muchapondwa, E at al (2008) Wildlife management in Zimbabwe: evidence from a contingent valuation study. South African Journal of Economics Vol. 76:4
107. Mudavanhu, S et al (2017) The economic value of ecosystem goods and services: The case of Mogale’s Gate Biodiversity Centre, South Africa. Ecosystem Services 26, 127-136
108. Muleta, T. T., Kidane, M., & Bezie, A. (2020) The effect of land use/land cover change on ecosystem services values of Jibat forest landscape, Ethiopia. GeoJournal.
109. Munyuli, B. (2014) Social and Ecological Drivers of the Economic Value of Pollination Services Delivered to Coffee in Central Uganda
110. Musamba et al (2012) The Recreational Value of Wetlands: Activities, Socio-economic Activities and Consumers’ Surplus around Lake Victoria in Musoma Municipality, Tanzania. J Hum Ecol, 37(2): 85-92 (2012)
111. Mutoko et al (2015) Tropical forest conservation versus conversion trade-offs: Insights from analysis of ecosystem services provided by Kakamega rainforest in Kenya. Volume 14, August 2015, Pages 1-11
112. Mwaura at al (2008) Valuation of protected areas in Uganda: a case study of Murchison falls conservation complex
113. Naidoo et al (2011) Effect of biodiversity on economic benefits from communal lands in Namibia. Journal of Applied Ecology, 48 (310-316)
114. Naidoo, R. and W.L. Adamowicz (2005) Biodiversity and Nature-Based Tourism at Forest Reserves in Uganda, Environment and Development Economics 10(2): 158-178.
115. Naidoo, R. and W.L. Adamowicz (2005) Biodiversity and Nature-Based Tourism at Forest Reserves in Uganda, Environment and Development Economics 10(2): 158-178.
116. Navrud, S. and E.D. Mungatana (1994) Environmental valuation in developing countries: The recreational value of wildlife viewing. Ecological Economics 11(2): 135-151.
117. Neiland, A., Béné, C. (2004) Incorporating Fish Market and Trade Information into Policy-Making for Sustainable Livelihoods and Poverty Reduction: Methods and Lessons from the Lake Chad Basin
118. Nelson et al (2009) Payments for Ecosystem Services as a Framework for Community-Based Conservation in Northern Tanzania. Conservation Biology
119. Nemb, P.S., Yah, N.C. (2010) The effects of information in contingent markets for environmental goods: Illustration from the Dja Forest Park in Cameroon. Journal of Sustainable Development in Africa (Volume 12, No.6, 2010)
120. Ninan, K. N., & Inoue, M. (2013) Valuing forest ecosystem services: What we know and what we don’t. Ecological Economics, 93, 137–149.
121. Ntupwa, N.W. (2010) Livelihoods and economic benefits of wetland utilization in the little Ruaha sub-catchment, Mufindi, Iringa
122. Nwankwoala, H.O. (2012) Case studies on coastal wetlands and water resources in Nigeria. European Journal of Sustainable Development, 1, 2, 113-126
123. Ogbazghi, W., Bein, E. (2006) Assessment of Non-Wood Forest Producing Products and their Role in the Livelihoods of Rural Communities in the Gash-Barka Region, Eritrea. Drylands Coordination Group Report No. 40
124. Ogeh, K.T., Jimoh, S.O., Ajewole, O.I. (2016) Willingness to Pay For Environmental Service Functions of Mangrove Forest In Uzere, Delta State, Nigeria. Journal of Resources Development and Management. Vol.16, 2016
125. Oka, P., Effiong, E. (2014) Mangrove forest ecosystem utilization for sustainable livelihood in Calabar South, Nigeria. International Journal of Ecology and Ecosolution. Vol. 1(2), pp. 42-51
126. Okojie, L.O., Akinwumi, J.A. (2011) Monetizing the Environmental Welfare Impact of Deforestation in Ogun State, Nigeria: The Contingent Valuation Approach
127. Olalekan et al. (2014) Wetland Resources of Nigeria: Case Study of the Hadejia-Nguru Wetlands. Poult Fish Wildl Sci 2014, 2:2
128. Osemeobo, G. J. (1991) A financial analysis of forest land use in Bendel, Nigeria. Forest Ecology and Management, 40(3-4), 233–241.
129. Pearce, D.W. and D. Moran (1994) The economic value of biodiversity. In association with the Biodiversity Programme of IUCN - The World Conservation Union, Earthscan Publications Ltd, London.
130. Pejchar, L., Mooney, H. A. (2009) Invasive species, ecosystem services and human well-being. Trends in ecology & evolution
131. Phillips, A. (ed) (1998) Economic values of protected areas: guidelines for protected area managers. Task Force on Economic Benefits of Protected Areas of the World Commission on Protected Areas (WCPA) of IUCN, in collaboration with the Economics Service Unit of IUCN, UK.
132. Popoola, L., & Ajewole, O. (2002) Willingness to pay for rehabilitation of ibadan urban environment through reforestation projects. International Journal of Sustainable Development & World Ecology, 9(3), 256–268
133. Poufoun, J.N., Abildtrup, J., Sonwa, D.J., Delacote, P. (2016) The value of endangered forest elephants to local communities in a transboundary conservation landscape. Ecological Economics 126 (2016), 70-86
134. Pouliot, M., Treue, T. (2013) Rural people's reliance on forests and the non-forest environment in West Africa: evidence from Ghana and Burkina Faso. World Development. Vol. 43, pp. 180–193
135. Rausser, G.C. and A.A. Small (2000) Valuing research leads: bioprospecting and the conservation of genetic resources. UC Berkeley: Berkeley Program in Law and Economics. Journal of Political Economy 108(1): 173-206.
136. Rojahn D.A. (2006) Incentive mechanisms for a sustainable use system of the montane rain forest in Ethiopia. PhD Dissertation, Christian Albrechts University, Germany, pp. 6-105
137. Ruitenbeek, H. J. (1992) The rainforest supply price: a tool for evaluating rainforest conservation expenditures. Ecological Economics, 6(1), 57–78.
138. Schaafsma et al (2013) The importance of local forest benefits: Economic valuation of Non-Timber Forest Products in the Eastern Arc Mountains in Tanzania. Global Environmental Change
139. Schaffler et al (2013) Valuing green infrastructure in an urban environment under pressure — The Johannesburg case. Ecological Economics 86 (2013) 246-257
140. Schuijt, K. (2002) Land and water use of wetlands in Africa: economic values of African Wetlands. Interim Reports. International Institute for Applied Systems Analysis, Laxenburg, Austria.
141. Seck, A. (2016) A dichotomous-choice contingent valuation of the Parc Zoologique de Hann in Dakar. Afr. J. Agric. Resour. Econ. 2016, 11, 226–238.
142. Seyam, I.M., A.Y. Hoekstra, G.S. Ngabirano and H.H.G. Savenije (2001) The value of freshwater wetlands in the Zambezi basin. Value of Water Research Report Series No. 7, IHE Delft, The Netherlands.
143. Shackleton, S. E., Shackleton, C. M., Netshiluvhi, T. R., Geach, B. S., Ballance, A., & Fairbanks, D. H. K. (2002) Use patterns and value of savanna resources in three rural villages in South Africa. Economic Botany, 56(2), 130–146. doi:10.1663/0013-0001(2002)056[0130:upavos]2.0.co;2
144. Shine, T., Dunford, B. (2016) What value for pastoral livelihoods? An economic valuation of development alternatives for ephemeral wetlands in eastern Mauritania. Pastoralism 6, Article number: 9
145. Silvestri, S., Zaibet, L., Said, M. Y., & Kifugo, S. C. (2013) Valuing ecosystem services for conservation and development purposes: A case study from Kenya. Environmental Science & Policy, 31, 23–33. doi:10.1016/j.envsci.2013.03.008
146. Simonit et al (2011) Sustainability and the value of the ‘regulating’ services: Wetlands and water quality in Lake Victoria. Ecological Economics, 70 (6), 1189-1199
147. Stein, K., Coulibaly, D., Stenchly, K., Goetze, D., Porembski, S., Lindner, A., Konate, S., Linsenmair, E. (2017) Bee pollination increases yield quantity and quality of cash crops in Burkina Faso, West Africa. Scientific Reports volume 7, Article number: 17691
148. Tadesse M. (2014) Analysis of Visitors Willingness to Pay for Recreational Use Value Of ''Menagesha Suba'' Forest Park: Application of Contingent Valuation Method
149. Tefera, M. (2006) Frontier community valuation for forest patches: the case of Wondo Wosha sub: catchment, Southern Nations, Nationalities and Peoples 'Region, Ethiopia. Ethiopian Journal of Natural Resources.2006. 8 (2): 281-293
150. Temesgen, H., Wu, W., Shi, X., Yirsaw, E., Bekele, B., & Kindu, M. (2018) Variation in Ecosystem Service Values in an Agroforestry Dominated Landscape in Ethiopia: Implications for Land Use and Conservation Policy. Sustainability, 10(4), 1126.
151. Tieguhong, J.C., Zwolinski, J. (2008) Unrevealed economic benefits from forests in Cameroon. IUFRO 4.05.00: Emerging needs of society from forest ecosystems
152. Tilahun, M., Vranken, L., Muys, B., Deckers, J., Gebregziabher, K., Gebrehiwot, K., … Mathijs, E. (2013) Rural Households’ Demand for Frankincense Forest Conservation in Tigray, Ethiopia: A Contingent Valuation Analysis. Land Degradation & Development, 26(7), 642–653.
153. Tolessa, T., Senbeta, F., & Kidane, M. (2017) The impact of land use/land cover change on ecosystem services in the central highlands of Ethiopia. Ecosystem Services,23, 47–54.
154. Turpie, J., B. Smith, L. Emerton and J. Barnes (1999) Economic value of the Zambezi Basin Wetlands. Zambezi Basin Wetlands conservation and resource utilization project. IUCN Regional Office for Southern Africa.
155. Turpie, J.K. (2000) The use and value of natural resources of the Rufiji Floodplain and Delta, Tanzania. Rufiji Environmental Managemet Project, Technical report No. 17.
156. Turpie, J.K. (2003) The existence value of biodiversity in South Africa: how interest, experience, knowledge, income and perceived level of threat influence local willingness to pay. Ecological Economics 46(1-2): 199-216.
157. Turpie, J.K., B.J. Heydenrych and S.J. Lamberth (2003) Economic value of terrestrial and marine biodiversity in the Cape Floristic Region: implications for defining effective and socially optimal conservation strategies. Biol. Conservation 112: 233-251.
158. Turufat Seifu (2017) Economic Valuation Natural Forest: The Case of Sheka Forest, South West Ethiopia. Vol 37 (2017)"
159. Udo, G.O., Egbenta, I.R. (2011) Using contingent valuation to value nonuse goods for compensation in Nigeria. Vol 20, No.8;Aug 2013
160. Wanjohi et al (2008) Valuation of Yala swamp for biodiversity conservation and poverty reduction
161. Ward, A. (2016) The extent and value of carbon stored in mountain grasslands and shrublands globally, and the prospects for using climate finance to address natural resource management issues
162. Yaron, G. (2001) Forest, Plantation Crops or Small-scale Agriculture? An Economic Analysis of Alternative Land Use Options in the Mount Cameroon Area. Journal of Environmental Planning and Management, 44(1), 85–108.
163. Yelkouni, M. (2002) Evaluation of natural resources: the case of Tiogo forest in Burkina Faso
164. Yilma, G. (2019) Wetlands ecosystem service in terms of economic values: A case of Lake Hawassa, southern Ethiopia. Plants and Environment (2019) 1(2): 89-96
165. Zapfack, L., Noumi, V.N., Kwouossu, D.P.J., Zemagho, L., Fomete Nembot, T. (2013) Deforestation and Carbon Stocks in the Surroundings of Lobéké National Park (Cameroon) in the Congo Basin. Environment and Natural Resources Research; Vol. 3, No. 2

**References used in the Supplementary materials**

Samasse, K., Hanan, N.P., Anchang, J.Y., Diallo, Y., 2020. A High-Resolution Cropland Map for the West African Sahel Based on High-Density Training Data, Google Earth Engine, and Locally Optimized Machine Learning. Remote Sens. 12, 1436. https://doi.org/10.3390/rs12091436

Tong, X., Brandt, M., Hiernaux, P., Herrmann, S., Rasmussen, L.V., Rasmussen, K., Tian, F., Tagesson, T., Zhang, W., Fensholt, R., 2020. The forgotten land use class: Mapping of fallow fields across the Sahel using Sentinel-2. Remote Sens. Environ. 239, 111598. https://doi.org/10.1016/j.rse.2019.111598

van Vliet, N., Reenberg, A., Rasmussen, L.V., 2013. Scientific documentation of crop land changes in the Sahel: A half empty box of knowledge to support policy? J. Arid Environ. 95, 1–13. https://doi.org/10.1016/j.jaridenv.2013.03.010

1. <https://lpdaac.usgs.gov/products/mcd12q1v006/> [↑](#footnote-ref-1)
